# Supplementary material for: Shape-controlled octahedral cobalt disulfide nanoparticles supported on nitrogen and sulfur-doped graphene/carbon nanotube composites for oxygen reduction in acidic electrolyte
Source: Royal Society of Chemistry journal article supplement (doi:10.1039/c4ta06667g), 2015-01-01
Supplement: c4ta06667g1.pdf [file c4ta06667g1.pdf]

**Shape-controlled octahedral cobalt disulfide nanoparticles supported on nitrogen and sulfur-doped graphene/carbon nanotube composites for oxygen reduction in acidic electrolyte**

*Drew Higgins, Fathy Hassan, Min Ho Seo, Ja-Yeon Choi, Ariful Hoque, Dong Un Lee, Zhongwei Chen\**

Department of Chemical Engineering, Waterloo Institute for Nanotechnology, Waterloo Institute of Sustainable Energy, University of Waterloo, 200 University Ave. W, Waterloo, ON, N2L 3G1, Canada. \*E-mail: zhwchen@uwaterloo.ca

**Supporting information**

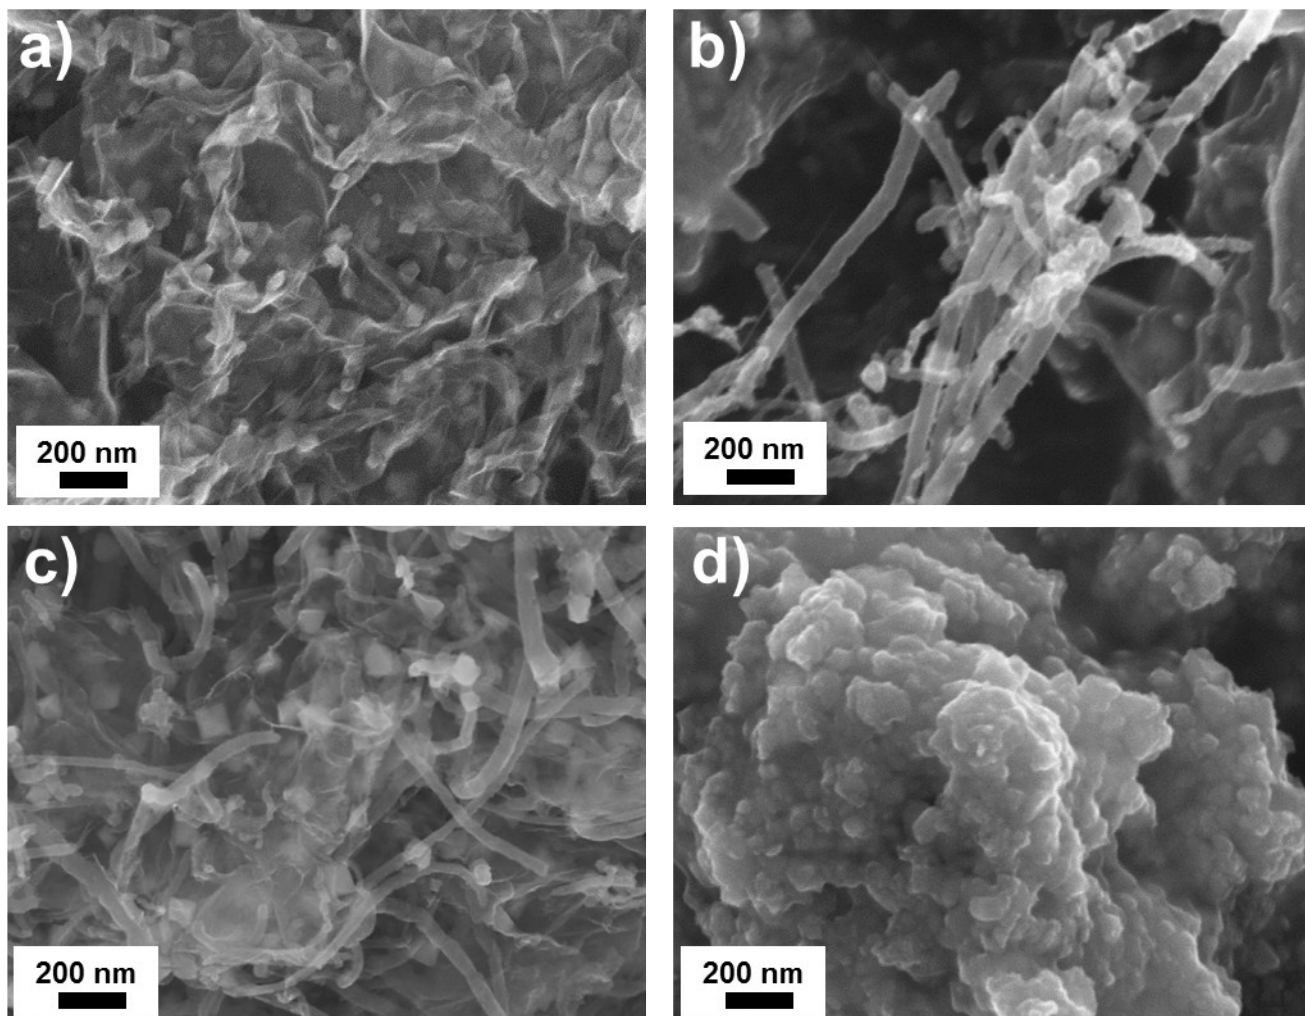

**Figure S1.** SEM images of (a) CoS<sub>2</sub>-G, (b) CoS<sub>2</sub>-C, (c) CoS<sub>2</sub>-CG and (d) as-prepared, unsupported CoS<sub>2</sub>.

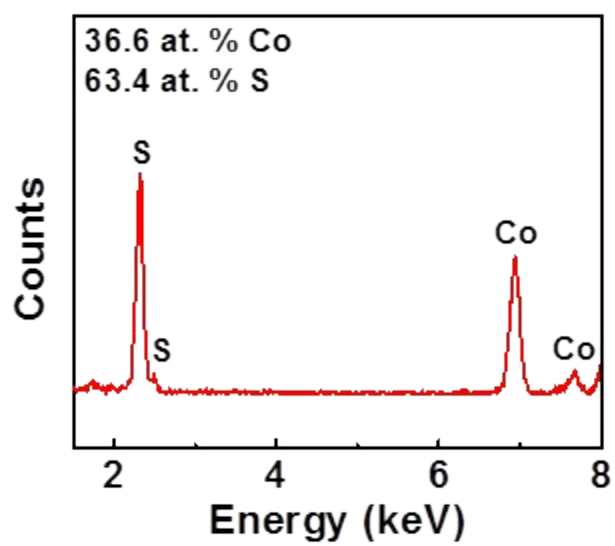

**Figure S2.** Energy dispersive x-ray spectrum of a single CoS<sub>2</sub> octahedral nanoparticle from the CoS<sub>2</sub>-CG sample.

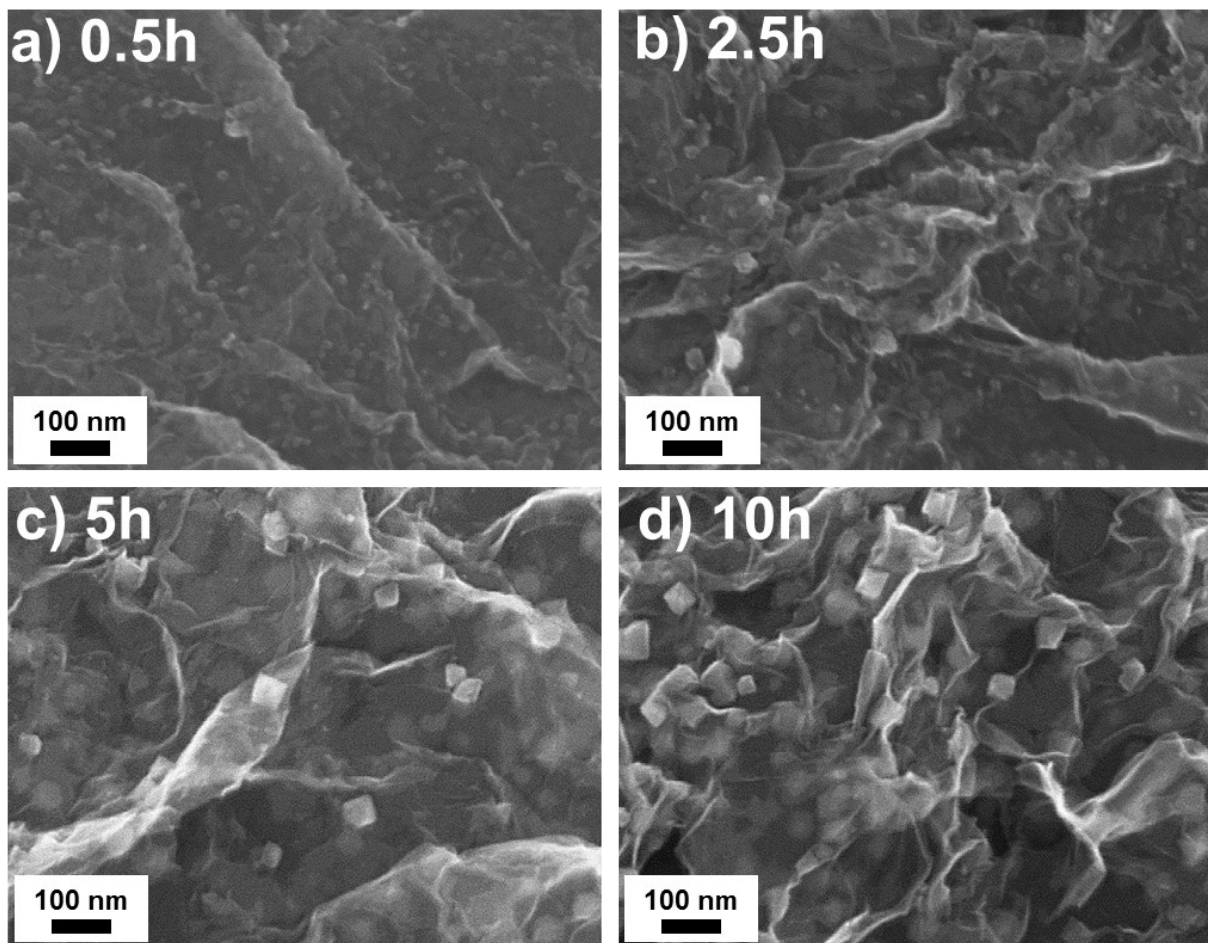

**Figure S3.** SEM images of the time dependent growth of CoS<sub>2</sub> supported on graphene held at 220 °C for (a) 0.5 h, (b) 2.5 h, (c) 5 h and (d) 10 h.

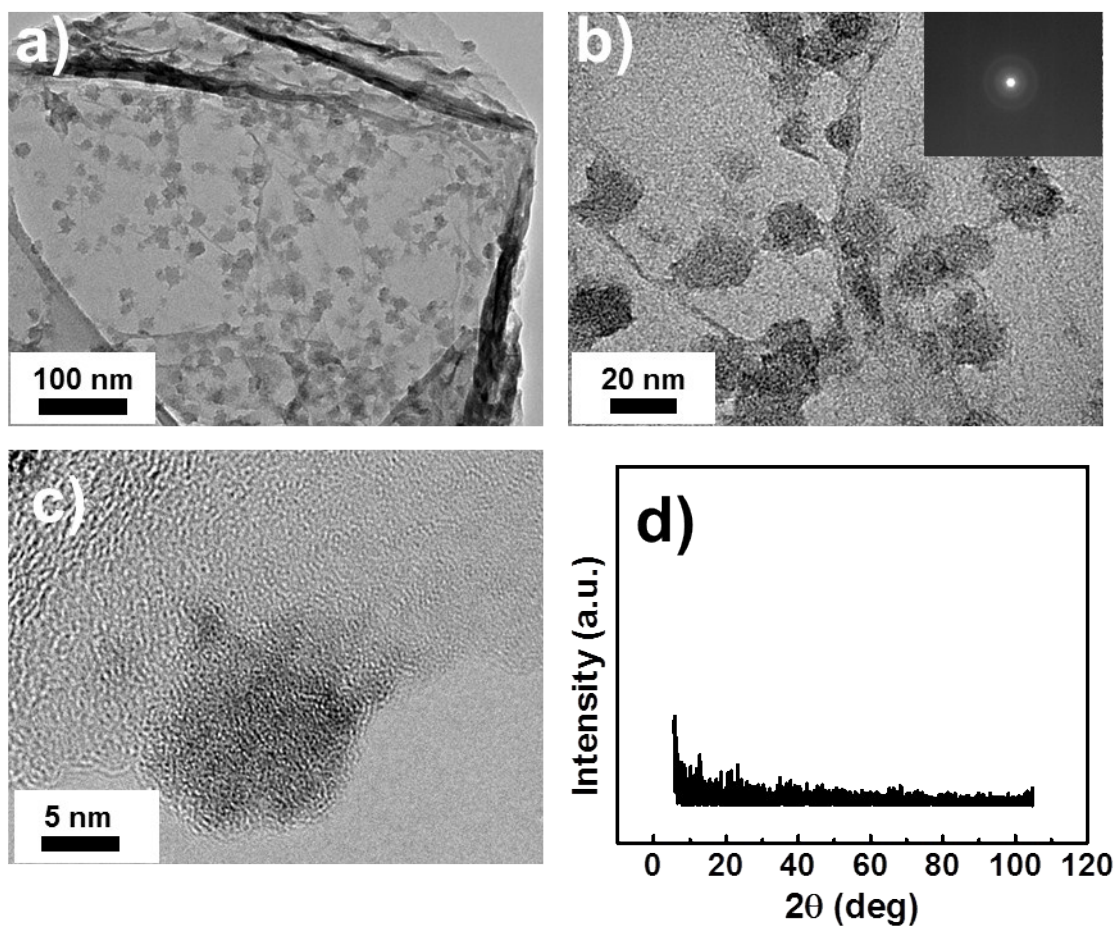

**Figure S4.** (a,b) TEM images, (c) high resolution TEM image, (d) XRD pattern and (b-inset) SAED pattern of CoSG-120.

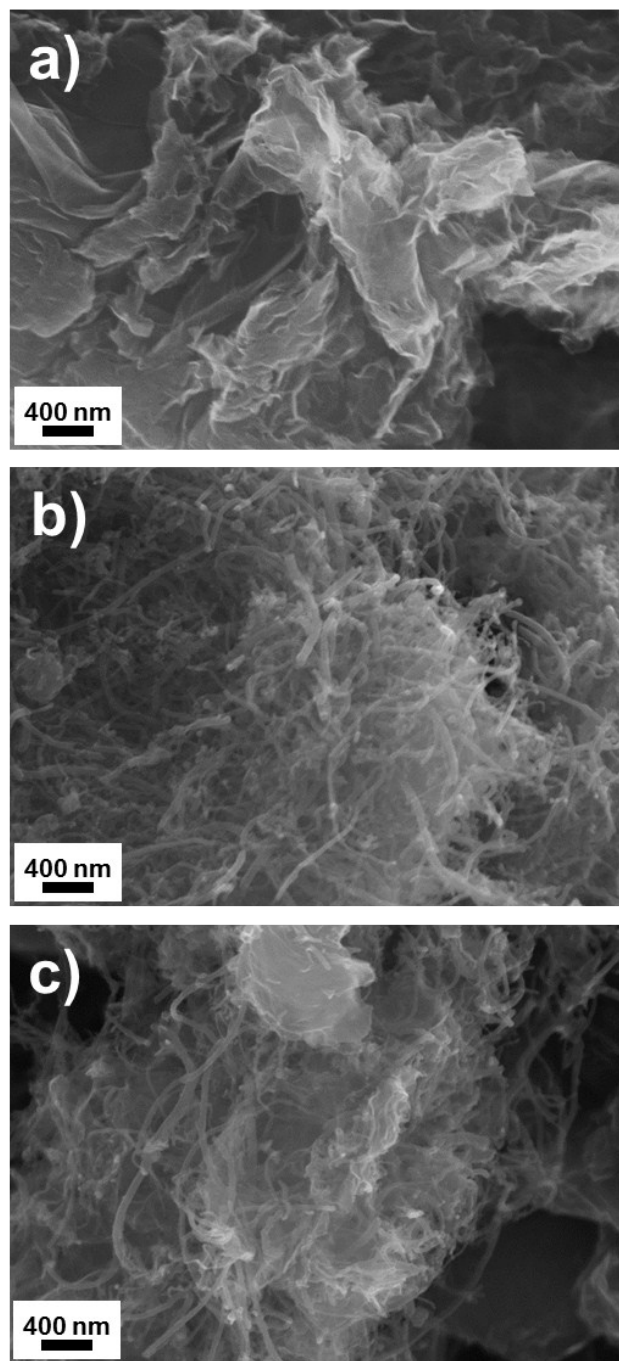

**Figure S5.** SEM images of (a) NS-G, (b) NS-C and (c) NS-CG.

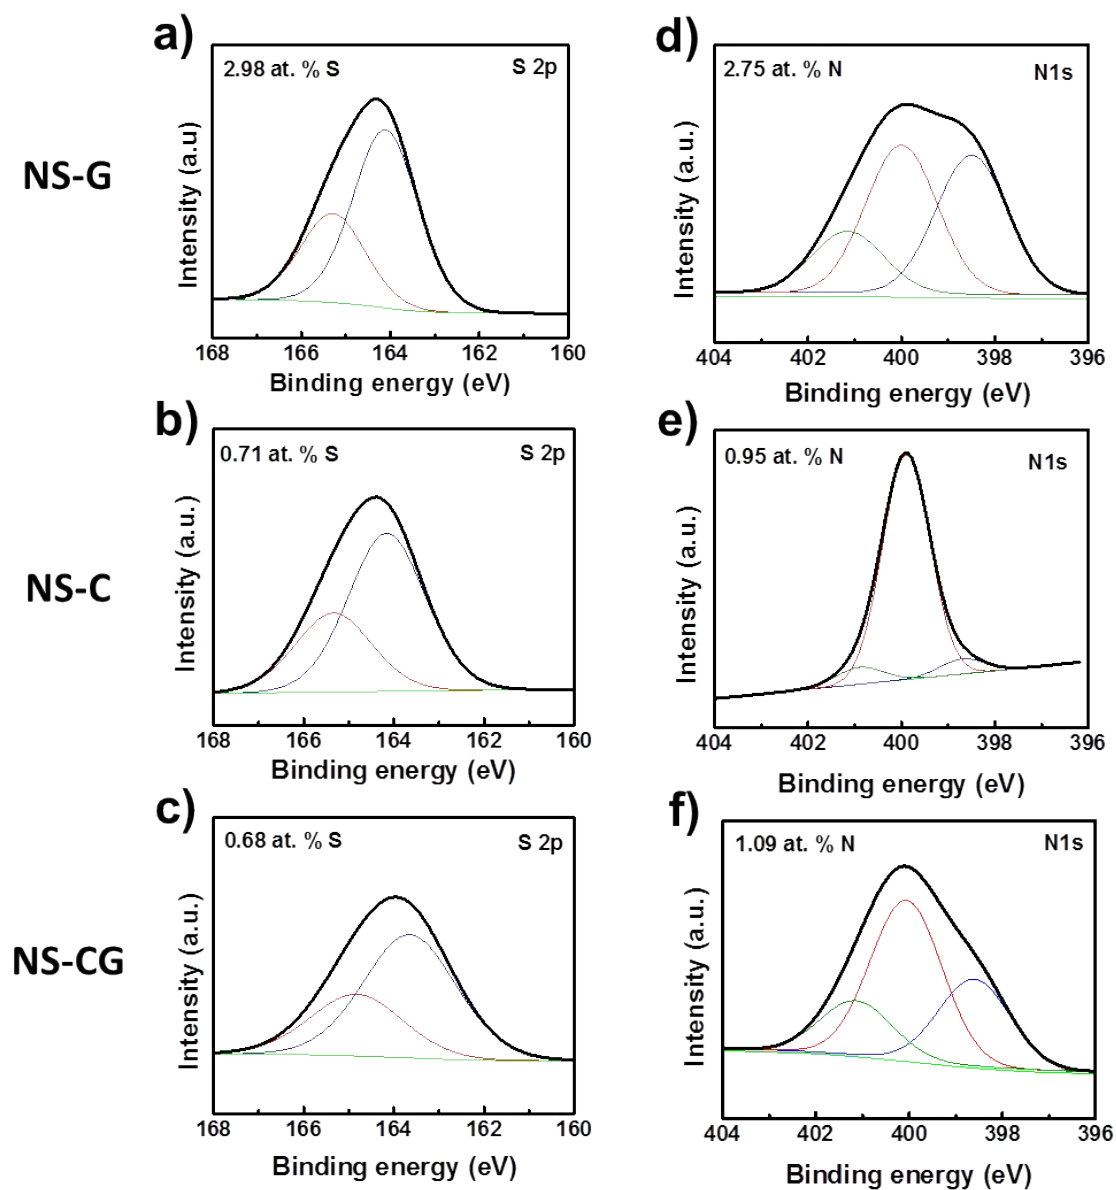

**Figure S6.** High resolution XPS (a-c) S2p and (d-f) N1s spectra for NS-G, NS-C and NS-CG.

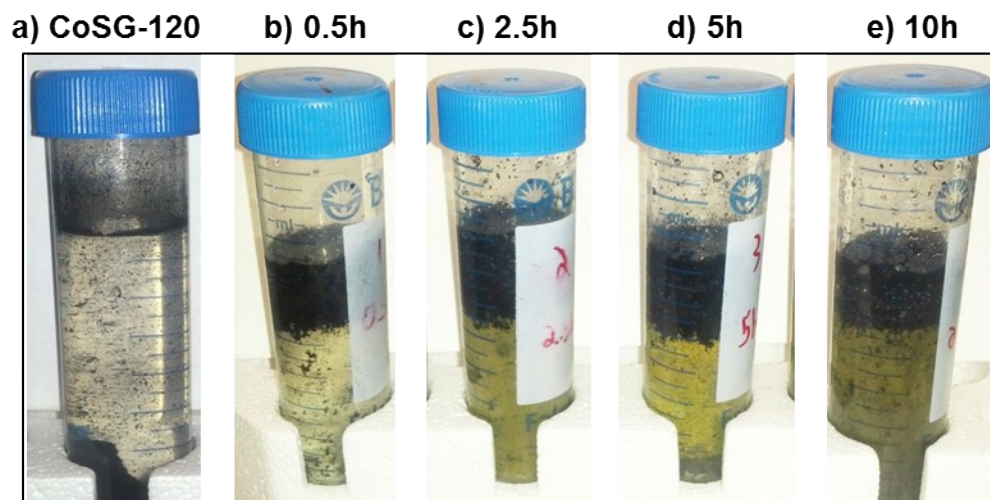

**Figure S7.** Solution obtained after solvothermal synthesis for (a) CoSG-120 and CoS<sub>2</sub> supported on graphene reaction mixture materials held at 220 °C for (b) 0.5 h, (c) 2.5 h, (d) 5 h and (e) 10 h.



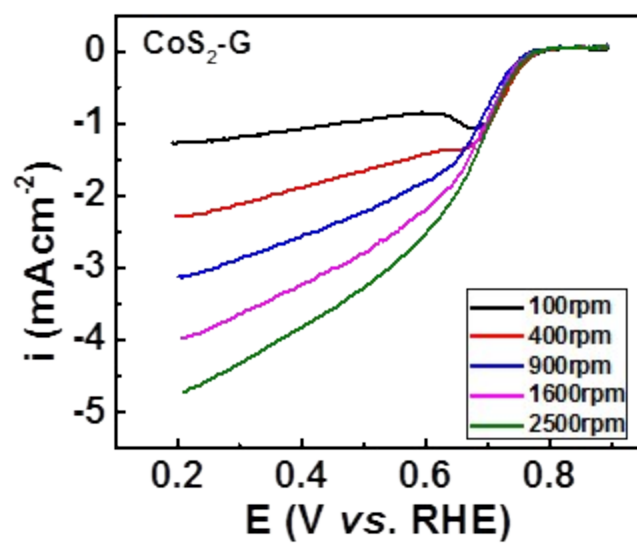

**Figure S8.** ORR polarization curve for CoS<sub>2</sub>-G at various electrode rotation rates.

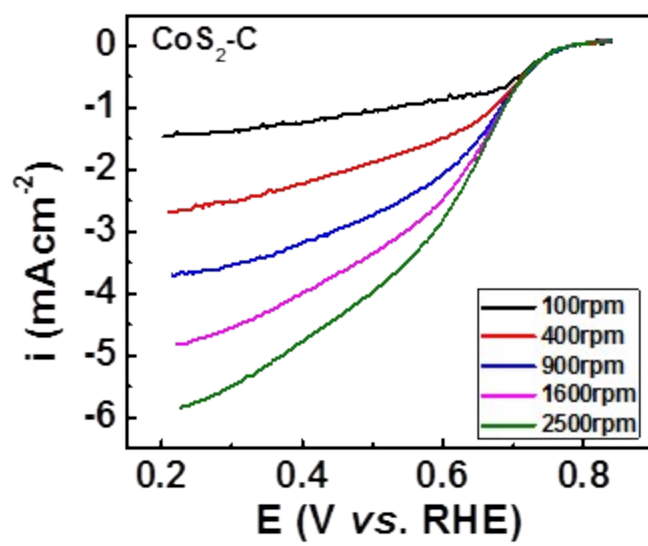

**Figure S9.** ORR polarization curve for CoS<sub>2</sub>-C at various electrode rotation rates.

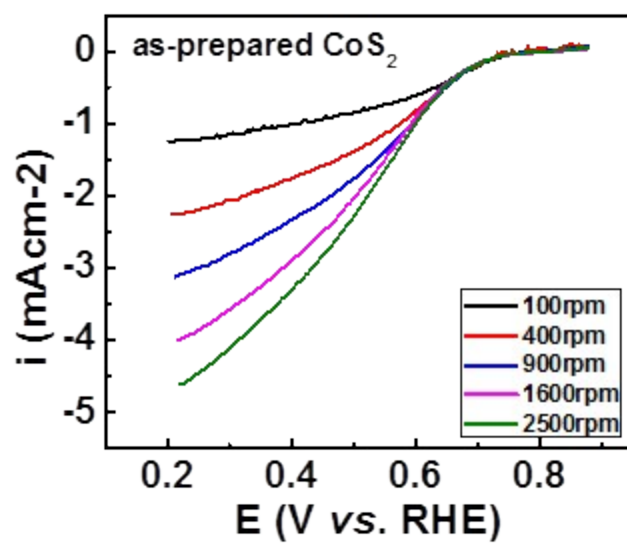

**Figure S10.** ORR polarization curve for as-prepared  $\text{CoS}_2$  at various electrode rotation rates.

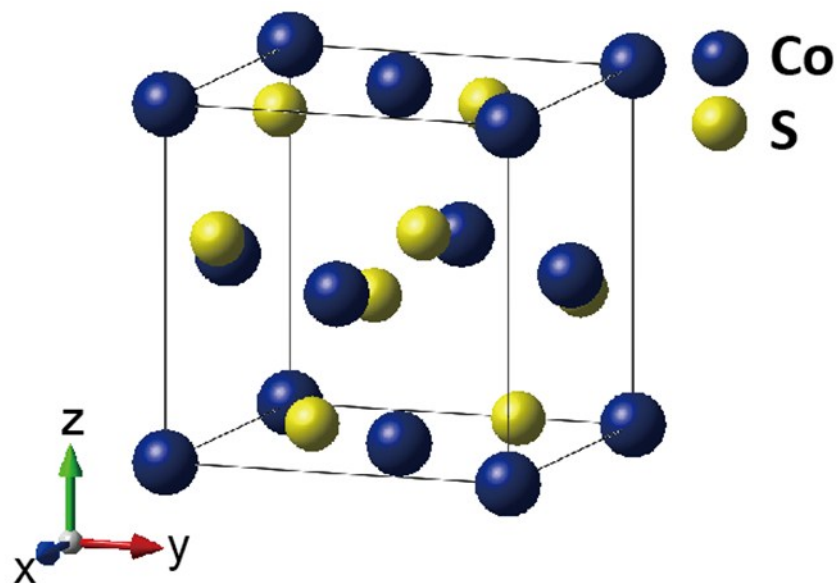

**Figure S11.** Fully relaxed bulk  $\text{CoS}_2$  structure.
